# Supplementary material for: Response of Soil Fungal Diversity and Community Composition to Varying Levels of Bamboo Biochar in Red Soils
Source: MDPI journal article supplement (doi:10.3390/microorganisms9071385), 2021-06-25
Supplement: s1 [file s1]

**Table S1: Basic properties of soil and biochar used in this study.**

| Characteristics                               | Bamboo Biochar | Soil    |
|-----------------------------------------------|----------------|---------|
| pH                                            | 9.687          | 4.685   |
| Electrical Conductivity (mScm <sup>-1</sup> ) | 3.140          | 106.667 |
| Total Nitrogen (g kg <sup>-1</sup> )          | 6.243          | 0.497   |
| Total Carbon (g kg <sup>-1</sup> )            | 311.220        | 3.358   |
| Total Phosphorous(g kg <sup>-1</sup> )        | 0.399          | 0.256   |
| Available Phosphorous (mg kg <sup>-1</sup> )  | 32.381         | 10.245  |
| Organic Matter (g kg <sup>-1</sup> )          | 536.543        | 5.790   |
| Available Potassium (g kg <sup>-1</sup> )     | 0.335          | 0.356   |
| C/N Ratio                                     | 49.975         | 6.864   |
